# Supplementary material for: Assessing low-dose copper treatment for dreissenid mussels: effects on nontarget organisms
Source: Research Square preprint supplement (doi:10.21203/rs.3.rs-6205980/v1), 2025-03-14
Supplement: Supplementary file 1 [file a0c9267add420d8fe55a301e.docx]

# Supplemental materials for: Assessing low-dose copper treatment for dreissenid mussels: effects on nontarget organisms

Dahlberg et al., 2025

**RMB Environmental Laboratory, Inc.**

**220 W 95th Street, Bloomington, MN 55431, USA**

*Chlorophyll-*a

Chlorophyll-*a* was analyzed according to APHA method 10200 H.3 with correction for pheophytin (APHA, 2012).

References

[APHA] American Public Health Association, American Water Works Association, Water Environment Federation. 2012. Standard methods for the examination of water and wastewater. 22nd ed. Rice EW, Baird RB, Eaton AD, Clesceri LS, Bridgewater L, editors. Washington, DC: American Public Health Association.

*Zooplankton and veligers*

RMB Environmental Laboratories uses the following protocol to analyze lake zooplankton samples based on Minnesota Department of Natural Resources laboratory procedures. Each zooplankton sample was filtered through an 80-μm mesh sieve, with the original alcohol retained for future sample preservation. Specimens were rinsed into a graduated beaker, and water was added to dilute the sample to a known volume. An aliquot of 1 mL was withdrawn from each sample using a pipette and transferred to a Sedgewick-Rafter counting cell. Specimens from each aliquot were enumerated and identified to family or genus level where possible. In the copepod group, only mature calanoid specimens and mature female cyclopoid specimens could be identified beyond family level. Each cell was also analyzed for zebra mussel veligers using cross-polarized light sources. Veligers were enumerated and grouped into the following size classes: D-hinge (<112 μm), umbonal (112-231 μm), and pediveliger (>231 μm). Measurements were taken using digital imaging software to confirm specimen lengths where needed. Additional 1-mL aliquot subsamples were analyzed until a minimum of 150 zooplankton specimens were identified. The sample was then condensed into glass Petri dishes for a large/rare scan. Samples were analyzed under a dissecting microscope for large organisms such as *Leptodora* or *Bythotrephes*, which are not collected as readily through subsampling methods. Densities (individuals per liter) and total counts for each taxonomic group identified were calculated for each sample.

Guides used in zooplankton identification:

Balcer, M. D., N. L. Korda, and S. I. Dodson. 1984. Zooplankton of the Great Lakes: A Guide to the Identification and Ecology of the Common Crustacean Species. University of Wisconsin Press, Madison, WI.

Smith, D. G. 2001. Pennak’s Freshwater Invertebrates of the United States: Porifera to Crustacea. 4th edition. John Wiley and Sons, Inc., Hoboken, NJ.

Torke, B. G. 1979. A key to the identification of the cyclopoid copepods of Wisconsin, with notes on their distribution and ecology. Wisconsin Department of Natural Resources.

*Benthic invertebrates*

RMB Environmental Laboratories uses the following protocol to analyze lake macroinvertebrate samples based on Minnesota Pollution Control Agency laboratory procedures. Each macroinvertebrate sample was filtered through an 80-µm mesh sieve, with the original alcohol retained for future sample preservation. The sample was rinsed into a series of glass Petri dishes with water to allow the detritus to be easily moved around and searched for organisms. Samples were searched under a dissecting scope at low power (7–10x) to locate all macroinvertebrate specimens, which were stored in a vial with 80% ethanol. Samples with macroinvertebrates far exceeding the 300-count target were to be subsampled; however, none of the samples in this project reached densities that high. The remaining debris was returned to the original sample container and preserved with the original alcohol. Each sample was identified to genus level where possible using current published taxonomic references. Taxonomically challenging specimens were photographed and other taxonomists were consulted to determine designations. All identifications were recorded on original data sheets and entered in a spreadsheet for the project.

Guides used in benthi invertebrate identification:

Burch, J. B. 1989. North American freshwater snails. Malacological Publications, Hamburg, MI.

Burch, J. P. 1972. Freshwater sphaeriacean clams (Mollusca: Pelecypoda) of North America. University of Michigan Library, Ann Arbor, MI.

Hilsenhoff, W. L. 1995. Aquatic insects of Wisconsin: keys to Wisconsin genera and notes on biology, habitat, distribution and species, no. 3. Natural History Museums Council, University of Wisconsin-Madison, Madison, WI.

Holsinger, J. R., Oceanography and Limnology Program (Smithsonian Institution), and U.S. Environmental Protection Agency. 1972. The freshwater amphipod crustaceans (Gammaridae) of North America. Biota of freshwater ecosystems identification manual no. 5, U.S. Environmental Protection Agency, Washington, DC.

Kathman, R. D., and R. O. Binkhurst. 1998. Guide to the freshwater oligochaetes of North America. Aquatic Resources Center, College Grove, TN.

Klemm, D. J. 1985. A guide to the freshwater Annelida (Polychaeta, naidid and tubificid Oligochaeta, and Hirudinea) of North America. Kendal Hunt Publishing Company, Dubuque, IA.

Klemm, D. J. 1991. Taxonomy and pollution ecology of the Great Lakes region leeches (Annelida: Hirudinea). Michigan Academy of Science, Arts, and Letters, Alma, MI.

Klubertanz, T. H. 2016. Mayfly larvae of Wisconsin. University of Wisconsin-Extension, Madison, WI.

Merritt, R. W., K. W. Cummins, and M. B. Berg, editors. 2019. An Introduction to the Aquatic Insects of North America. 5th edition. Kendal Hunt Publishing Company, Dubuque, IA.

Needham, J. G., M. J. Westfall, and M. L. May. 2000. Dragonflies of North America. Revised. Scientific Publishers, Gainesville, FL.

Peckarsky, B. L., P. R. Fraissnet, M. Penton, and D. J. Conklin. 1990. Freshwater Macroinvertebrates of Northeastern North America. New Books, Inc., Portland, OR.

Smith, D. G. 2001. Pennak’s Freshwater Invertebrates of the United States: Porifera to Crustacea. 4th edition. John Wiley and Sons, Inc., Hoboken, NJ.

Wiggins, G. B. 1996. Larvae of the North American caddisfly genera (Trichoptera). 2nd edition. University of Toronto Press, Ottowa, ON.

Williams, W. D., Oceanography and Limnology Program (Smithsonian Institution), and U.S. Environmental Protection Agency. 1972. Freshwater isopods (Asellidae) of North America. Biota of freshwater ecosystems identification manual no. 7, U.S. Environmental Protection Agency, Washington, DC.

**Iowa State University – Veterinary Diagnostics Laboratory**

**1850 Christensen Drice, Ames, IA 50011, USA**

*Tissue copper*

All samples were analyzed for copper (Cu) using Inductively Coupled Plasma Mass Spectrometry (ICP-MS; Analytik Jena Inc. Woburn, Massachusetts, USA) in CRI mode with hydrogen as the skimmer gas. Standards for elemental analyses were obtained from Inorganic Ventures (Christiansburg, Virginia), while digestion vessels, trace mineral grade nitric acid and hydrochloric acid were obtained from Fisher Scientific (Pittsburgh, Pennsylvania). Following thawing at room temperature, samples were processed and analyzed following Iowa State University-Veterinary Diagnostic Laboratory (ISU-VDL) Standard Operating Procedures for Cu analysis. Both the fish and the mussel samples were analyzed on a wet weight basis. Briefly, samples were digested in 70% nitric acid at 70 °C in a dry bath overnight. For the fish analysis, the entire sample was weighed into a 50-mL digestion tube, and 5 mL of 70% nitric acid was added; as needed additional acid was added 1 mL at a time until the fish was submersed in the acid. The average fish weight was 2.72 g with a low value of 0.11 g and a high value of 10.36 g. After digestion, all samples were diluted to 25 mL using 1% nitric acid. An additional a 1:10 dilution was made using 1% nitric acid and analyzed by ICP-MS. The nitric acid percentage in the final digest was from 2–4% for the fish samples. For the mussel analysis, the entire sample was weighed into a 15-mL digestion tube, and 0.5 mL of 70% nitric acid was added prior to the digestion. After digestion, all samples were diluted to 5 mL using 1% nitric acid. Mussels digests were directly analyzed by ICP-MS. The average mussel weigh was 0.23 g with a low value of 0.10 g and a high value of 0.51 g. However, occasionally samples with elevated Cu needed an additional dilution made using 1% nitric acid and were analyzed by ICP-MS after the dilution. The nitric acid percentage in the final digest was from 2–14% for the mussel samples. For Cu we used Yttrium (Y) as internal standard for the ICP-MS; the acceptable criterion for the internal standard was a ratio of 0.7 to 1.2. Quality control samples ran with each analysis include a NIST liver as well as an “inhouse” control liver created at ISU-VDL.

Standards are prepared from a 1000-parts-per-million (ppm) stock solution of ICP-MS grade. The 1000-ppm stock solution is initially diluted 1:10 to make an intermediate standard at a 100-ppm concentration. The 100-ppm standard is further diluted to make 2- and 1-ppm standards. These standards are diluted to make 0.2- and 0.1-ppm standards. A final dilution of the 2- and 1-ppm standards is performed to obtain 0.02- and 0.01-ppm standards. All dilutions were performed with 1% nitric acid as the diluent.

The acceptable ranges reflect the expected results +/- 2 standard deviation. The expected value for the NIST Control Liver is 142.5 ppm with a standard deviation of 14.1 ppm, which gives a percent relative standard deviation of 9.9% (Table 2.1). The expected value for In House Control Liver is 57.0 ppm with a standard deviation of 6.6 ppm, which gives a percent relative standard deviation of 11.6%.

Table 2.1. Quality control summary of tissue copper analysis performed by Iowa State University-Veterinary Diagnostic Laboratory (ISU-VDL).

| Analysis Date | NIST Controla  (Cu ppm) | VDL Controlb  (Cu ppm) |
| --- | --- | --- |
| 14-Aug-19 | 127.0 | 47.8 |
| 21-Aug-19 | 119.3 | 45.1 |
| 23-Aug-19 | 128.2 | 48.9 |
| 27-Aug-19 | 130.8 | 48.6 |
| aNIST acceptable range 114.4–170.6 ppm. | | |
| bVDL acceptable range 43.8–70.3 ppm. | | |

Table 2.2. Instrument parameters for Inductively Coupled Plasma-Mass Spectroscopy analysis of tissue copper performed by Iowa State University-Veterinary Diagnostic Laboratory.

| Parameter | Value |
| --- | --- |
| Flow parameters (L/min) | |
| Plasma flow | 16.5 |
| Auxiliary flow | 1.65 |
| Sheath gas | 0.10 |
| Nebulizer flow | 0.94 |
| Torch Alignment (mm) | |
| Sampling depth | 6.5 |
| Miscellaneous | |
| Radio frequency (RF) power (kW) | 1.4 |
| Pump rate (rpm) | 4 |
| Stabilization (s) | 30 |
| Ion Optics (volts) | |
| First extraction lens | -20 |
| Second extraction lens | -174 |
| Third extraction lens | -150 |
| Corner lens | -240 |
| Mirror lens left | 9 |
| Mirror lens right | 22 |
| Mirror lens bottom | 25 |
| Entrance lens | -1 |
